# Supplementary material for: Recent developments in the control of selectivity in hydrogenation reactions by confined metal functionalities
Source: Royal Society of Chemistry journal article supplement (doi:10.1039/d0cy01709d), 2020-01-01
Supplement: d0cy01709d1.pdf [file d0cy01709d1.pdf]

## **Recent developments in the control of selectivity in hydrogenation reactions by confined metal functionalities**

Moussa Zaarour†, Jurjen Cazemier†, Javier Ruiz-Martinez\*

King Abdullah University of Science and Technology, KAUST Catalysis Center (KCC), Catalysis Nanomaterials and Spectroscopy (CNS), Thuwal 23955, Saudi Arabia.

Mail: [javier.ruizmartinez@kaust.edu.sa](mailto:javier.ruizmartinez@kaust.edu.sa).

Telephone: +966128084530

†These authors contributed equally to this work

**Table S1.** Typical zeolites used as encapsulants for metal active sites in the selective

| Zeolite                 | Channel composition        | Aperture                    |
|-------------------------|----------------------------|-----------------------------|
| Sodalite (SOD)          | 6 membered rings           | 2.8 x 2.8 Å                 |
| Chabazite (CHA)         | 8 membered rings           | 3.8 x 3.8 Å                 |
| Analcime (ANA)          | Distorted 8 membered rings | 1.6 x 4.2 Å                 |
| Linde Type A (LTA)      | 8 membered rings           | 4.1 x 4.1 Å                 |
| Gismondine (GIS)        | 8 membered rings           | 3.1 x 4.5 Å and 2.8 x 4.8 Å |
| Ferrierite (FER)        | 10 and 8 membered rings    | 4.2 x 5.4 Å and 3.5 x 4.8 Å |
| MCM-22 (MWW)            | 10 membered rings          | 4.0 x 5.5 Å and 4.1 x 5.1 Å |
| ZSM-5 (MFI)             | 10 membered rings          | 5.1 x 5.5 Å and 5.3 x 5.6 Å |
| Beta polymorph A (*BEA) | 12 membered rings          | 6.6 x 6.7 Å and 5.6 x 5.6 Å |
| Faujasite (FAU)         | 12 membered rings          | 7.4 x 7.4 Å                 |

hydrogenation reactions.

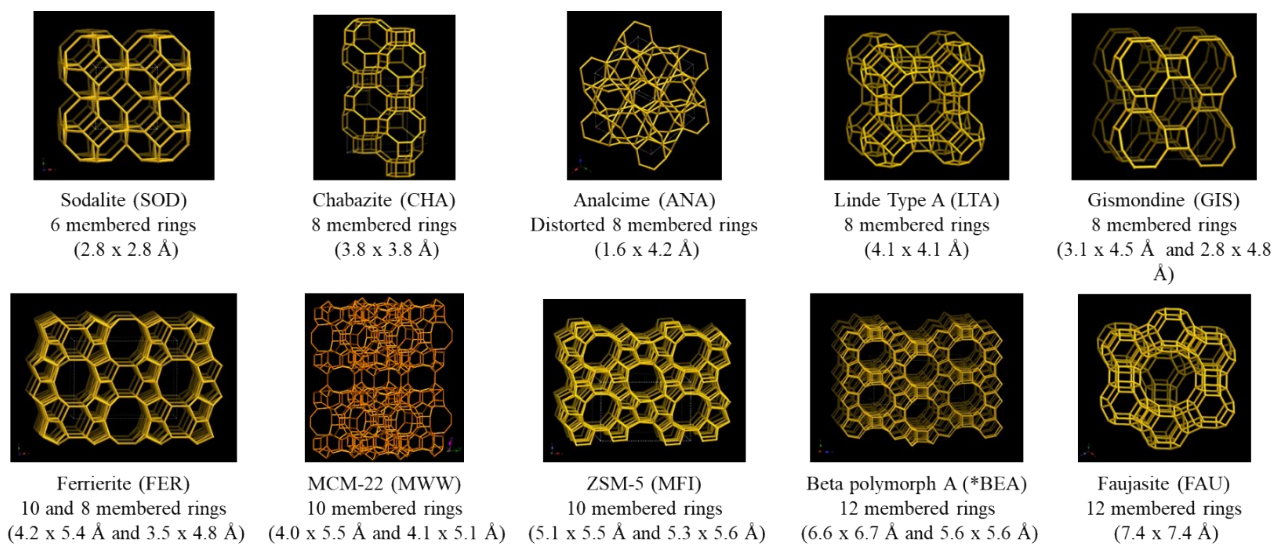**Figure S1.** Typical zeolites used as encapsulants for metal active sites in the selective hydrogenation reactions.
